# Supplementary material for: Transcriptomic Analysis Reveals the Contribution of QMrl-7B to Wheat Root Growth and Development
Source: Research Square preprint supplement (doi:10.21203/rs.3.rs-124839/v1), 2020-12-17
Supplement: Supplementary file 1 [file 3a22f0d5fda47b98ae013e14.doc]

Transcriptomic analysis reveals the contribution of *QMrl-7B*

to wheat root growth and development

Jiajia Liua,#,Hanwen Lib,#, Na Zhanga,d, Deyuan Menga, Liya Zhia, Xiaoli Rena, Jun Jia,d, Zhenqi Sub, Junming Lia,d, Xiaoli Fan c, d,*, Liqiang Songa,d,*

a Center for Agricultural Resources Research, Institute of Genetics and Developmental Biology, Chinese Academy of Sciences, Shijiazhuang 050022, Hebei, China

b College of Agronomy and Biotechnology, China Agricultural University, Beijing 100193, China

c Chengdu Institute of Biology, Chinese Academy of Sciences, Chengdu 610041, China

d The Innovative Academy of Seed Design, Chinese Academy of Sciences, Beijing 100101, China

# Jiajia Liu and Hanwen Li contributed equally to this work.

* Corresponding authors: Xiaoli Fan; Liqiang Song

E-mail address: fanjie198656@aliyun.com; lqsong@sjziam.ac.cn

Tel: +86-311-85887272

Fax: +86-311-85815093

**Additional file 1: Supplementary Figure 1.**

**The root traits of the five-leaf seedlings for the pairwised *QMrl-7B* NILs cultured in different N nutrient solutions for twenty-one days**

(A) MRL, the maximum root length; (B) TRL, total root length; (C) RA, root surface area; (D) RV, root volumn. NN and LN indicate normal and low nitrogen conditions, respectively. AA and BB indicate the A-NIL with the superior alleles and the B-NIL with inferior alleles, respectively. “*” indicates the significant difference at *p* < 0.05.

(A-D) MRL, TRL, RA and RV of the five-leaf seedlings of the pairwised NILs in both NN and LN conditions.

**Additional file 2: Supplementary Figure 2.**

**Correlation analysis of each sample**

Heat map of correlation analysis of three biological replicates of each material. NN and LN indicate normal and low nitrogen conditions, respectively. AA and BB indicate the A-NIL and the B-NIL, respectively.

**Additional file 3: Supplementary Tables**

**Table S1** Primer information for qRT-PCR

**Table S2** Evaluation of RNA-seq data

**Table S3** Correlation coefficients between biological replicates of each material

**Table S4** TPM of genes in this study

**Table S5** DEGs between The A-NIL and the B-NIL under NN condition

**Table S6** GO enrichment analysis of DEGs on Table S5

**Table S7** KEGG enrichment analysis of DEGs on Table S5

**Table S8** DEGs between The A-NIL and the B-NIL under LN condition

**Table S9** GO enrichment analysis of DEGs on Table S8

**Table S10** KEGG enrichment analysis of DEGs on Table S8

**Table S11** DEGs whose expression increased and decreased simultaneously in the A-NIL under NN and LN conditions

**Table S12** GO enrichment analysis of DEGs on Table S11

**Table S13** KEGG enrichment analysis of DEGs on Table S11

**Table S14** DEGs specially expressed in the A-NIL in response to N deficiency

**Table S15** GO enrichment analysis of DEGs on Table S14

**Table S16** KEGG enrichment analysis of DEGs on Table S14

**Table S17** DEGs specially expressed in the B-NIL in response to N deficiency

**Table S18** GO enrichment analysis of DEGs on Table S17

**Table S19** KEGG enrichment analysis of DEGs on Table S17
